# Supplementary material
Source: PubMed Central journal article supplement (PMC8802308)
Supplement: NIHMS1573464-supplement-1.pdf [file NIHMS1573464-supplement-1.pdf]

Supplemental Figure 1

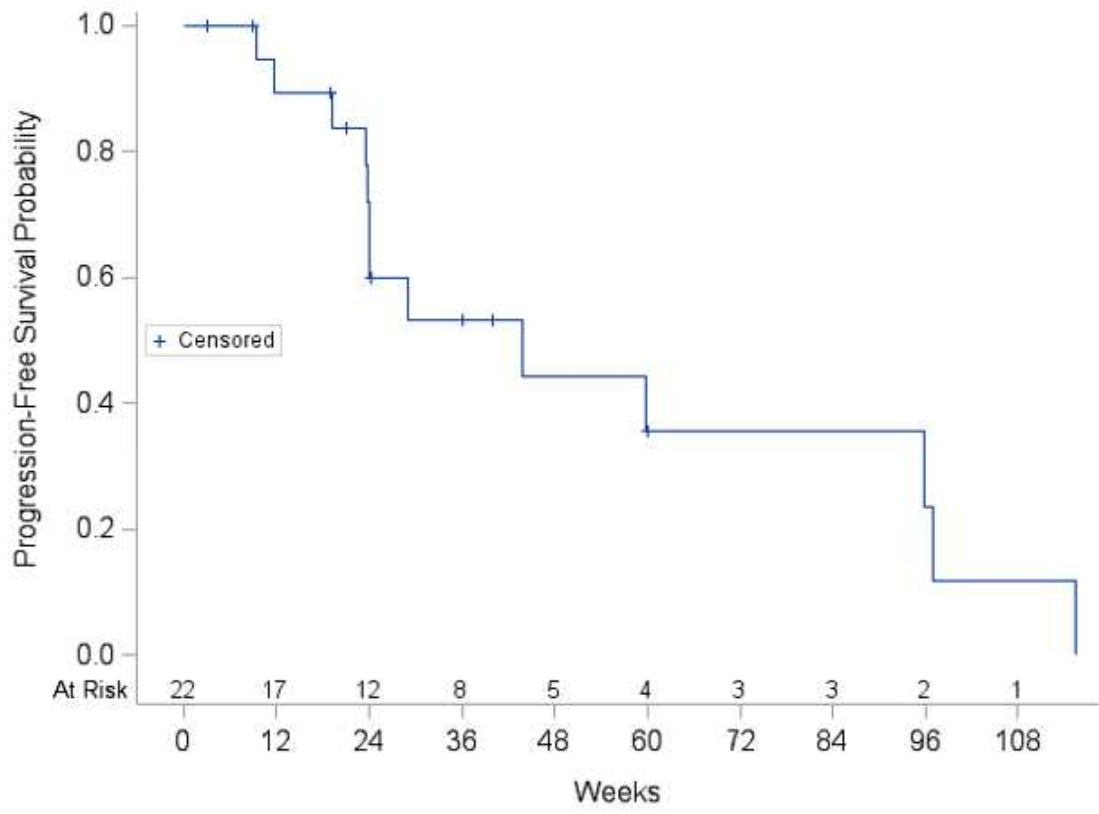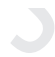

Supplemental Figure 2

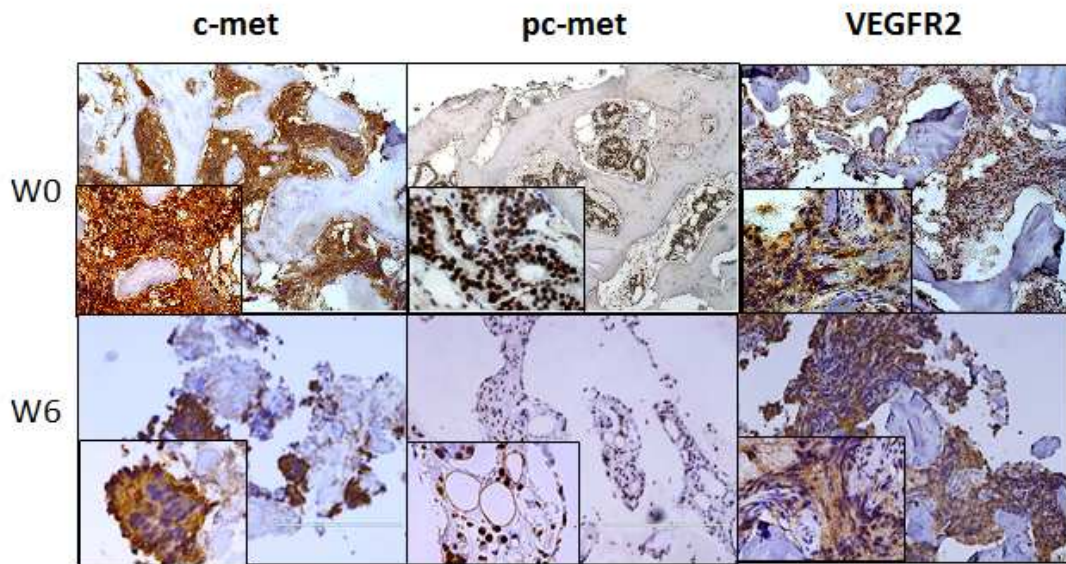

Legend: cmet : W0:Product Score = 240 (membrane+cytoplasmic, strong, 80% stained) W6:product score = 240 (mem+ cyto strong),  
pcmet: W0: Product Score=240 (nuclear), W6:Product Score = 180 (nuclear)  
VEGFR2: W0: Product Score=160 (predom cytoplasmic) W6: Product score = 160 (predom cytoplasmic)

JU

**Supplemental Table 1: Patient Characteristics**

|                   | Enrolled Patients<br>(N=25) | Evaluable Patients<br>(N=22) |
|-------------------|-----------------------------|------------------------------|
| Age:              |                             |                              |
| Mean (Range)      | 67.6 (58-79)                | 66.4 (58-79)                 |
| Baseline PSA:     |                             |                              |
| Median (Min, Max) | 78.7 (1.2, 928.3)           | 46.25 (1.2, 775.2)           |
| Race              |                             |                              |
| White             | 22 (88%)                    | 19 (86.4%)                   |
| Black             | 1 (4%)                      | 1 (4.6%)                     |
| Unknown           | 2 (8%)                      | 2 (9.1%)                     |
| Ethnicity         |                             |                              |
| Non-Hispanic      | 21 (84%)                    | 19 (86%)                     |
| Hispanic          | 0 (0%)                      | 0 (0%)                       |
| Unknown           | 4 (16%)                     | 3 (14%)                      |
| Sites of disease: |                             |                              |
| Bone (%)          |                             | 100%                         |
| < 3 lesions (n)   |                             | 3                            |
| 3-10 lesions      |                             | 6                            |
| >10 lesions       |                             | 13                           |
| Soft tissue (%)   |                             | 32%                          |
| Liver (n)         |                             | 4                            |
| Nodes             |                             | 1                            |
| Pelvic mass       |                             | 2                            |
